# Supplementary material for: A study exploring the neural mechanisms underlying tone perception in children with autism spectrum disorder
Source: Research Square preprint supplement (doi:10.21203/rs.3.rs-6535409/v1), 2025-06-03
Supplement: Supplementary file 1 [file b3aa7f5cde81ee9111fb608e.xlsx]

## Sheet: Sheet1
Number(Note: The same participant has two numbers for different stimuli)	age	sex(1=male，2=female)	Diagnosis（1=ASD，2=TD）	CARS	ABC-sensation	ABC-interpersonal skill	ABC-Locomotion	ABC-Language ability	ABC-self-care	ABC-Total score	PPVT-IQ
130/131	11	1	1	37.5	15	19	11	20	3	68	47
135/137	5	1	1	31	11	22	5	20	13	71	47
168/169	5	2	1	50	11	28	13	18	17	87	41
198/200	5	1	1	38	16	26	11	20	19	92	45
206/207	5	1	1	37.5	9	17	19	27	14	86	59
210/211	5	1	1	36.5	10	11	4	11	13	49	46
216/217	6	2	1	37	19	25	21	21	18	104	41
387/389	5	1	1	36.5	3	8	2	8	7	28	48
342/344	6	2	1	35.5	17	15	17	19	20	88	47
234/235	3	1	1	31.5	4	2	8	18	5	37	53
318/320	7	1	2
323/324	4	1	2
326/328	10	1	2
333/335	6	1	2
338/341	7	2	2
346/349	8	1	2
360/362	7	1	2
364/366	6	1	2
375/377	7	2	2
383/385	4	2	2
