# Supplementary material for: A study exploring the neural mechanisms underlying tone perception in children with autism spectrum disorder
Source: Research Square preprint supplement (doi:10.21203/rs.3.rs-6535409/v1), 2025-06-03
Supplement: Supplementary file 2 [file d8136cb5f152d3d418da896d.xlsx]

## Sheet: Sheet1
					Latency				Amplitude
Number	Age	Diagnosis（1=ASD，2=TD）	sex（1=male，2=female）	MMN （1=pure tone，2=tone）	Fz_MMN	Cz_MMN	Pz_MMN		Fz_MMN	Cz_MMN	Pz_MMN
130	11	1	1	1	81	83	78		-7.58	-7.07	-6.75
131	11	1	1	2	234	236	243		-2.30	-2.63	-4.07
135	5	1	1	1	88	85	86		-3.47	-5.86	-4.30
137	5	1	1	2	159	258	160		-2.36	-3.40	-1.47
168	5	1	2	1	180	148	147		-6.34	-4.23	-1.77
169	5	1	2	2	209	191	190		-2.09	-1.76	-0.59
198	5	1	1	1	112	114	194		-2.36	-1.84	-1.51
200	5	1	1	2	138	138	136		-3.17	-3.03	-3.32
206	5	1	1	1	153	149	150		-9.78	-8.03	-5.46
207	5	1	1	2	204	205	165		-5.00	-2.73	-3.90
210	5	1	1	1	153	148	142		-9.16	-7.83	-5.46
211	5	1	1	2	211	211	210		-2.47	-2.22	-1.78
217	6	1	2	2	206	170	121		-2.85	-1.50	-3.16
216	6	1	2	1	160	86	78		-2.74	-3.52	-8.11
387	5	1	1	1	143	143	73		-8.35	-5.50	-5.16
389	5	1	1	2	248	248	248		-4.02	-4.72	-4.26
344	6	1	2	2	132	131	177		-1.94	-1.58	-5.34
342	6	1	2	1	90	151	146		-4.03	-8.05	-9.38
235	3	1	1	2	131	132			-2.78	-2.61
234	3	1	1	1	232	93	79		-2.23	-3.71	-19.36
320	7	2	1	2	181	186	192		-3.90	-2.49	-3.10
318	7	2	1	1	90	101	168		-4.72	-3.64	-3.53
324	4	2	1	2	238	195			-2.81	-4.74
323	4	2	1	1	186	154			-4.63	-7.08
328	10	2	1	2	149	151	172		-1.56	-3.73	-3.08
326	10	2	1	1	165	133	137		-6.41	-7.96	-6.97
335	6	2	1	2	80	250	250		-2.69	-2.59	-4.28
333	6	2	1	1	171	215	234		-2.57	-2.66	-2.32
341	7	2	2	2	117	93	83		-0.61	-1.18	-2.27
338	7	2	2	1	131	139	131		-8.78	-7.39	-3.23
349	8	2	1	2	90	90	90		-4.40	-3.71	-1.90
346	8	2	1	1	145	145	142		-7.78	-8.50	-6.24
362	7	2	1	2	226	225	222		-2.24	-2.57	-2.01
360	7	2	1	1	146	158	159		-7.62	-6.02	-4.30
366	6	2	1	2	82	226	225		-1.98	-3.21	-3.33
364	6	2	1	1	160	161	195		-10.41	-7.42	-5.02
377	7	2	2	2	196	196	186		-5.40	-4.51	-4.85
375	7	2	2	1	125	128	134		-11.82	-9.75	-5.36
385	4	2	2	2	101	176	180		-1.63	-2.58	-3.63
383	4	2	2	1	93	92	134		-5.18	-6.11	-2.58
